# Supplementary material for: Differential use of salmon by vertebrate consumers: implications for conservation
Source: PeerJ. 2015 Aug 4;3:e1157. doi: 10.7717/peerj.1157 (PMC4558068; doi:10.7717/peerj.1157)
Supplement: Supplemental Information 2 [file peerj-03-1157-s002.xlsx]

## Sheet: newdata.csv
Camera	Location	Salmon	Lat	Long	CameraDays	EaglePerDay	BearPerDay	Time_EaglePerDay	Time_BearPerDay	MeanEaglePerDay	MeanBearPerDay
B57_10mile	10 mile Creek	pink	59.2852	-135.681	229	0	0.148472	0	0.333188	0	0.168915
B41_18_mile	18 mile Creek	pink	59.3654	-135.8	7	0	0.142857	0	0.0333333	0	0.228571
B50_ChilkatFlatsForest	Chilkat Flats Forest	chum	59.3806	-135.857	10	0	0.3	0	0.286667	0	0.5
B53_KlehiniBridge	Klehini Flats	chum	59.4136	-136.007	17	0	0.647059	0	0.19902	0	0.647059
B60_KlehiniFlats	Klehini Flats	chum	59.4144	-136.091	11	0	0.818182	0	0.218182	0	0.840909
B51_18mile	18 mile Creek	pink	59.3654	-135.799	42	0	0.833333	0	0.314286	0	0.902882
B44_KlehiniFlats	Klehini Flats	chum	59.4148	-136.095	11	0	1.09091	0	0.419697	0	1.17045
B53_18mile	18 mile Creek	pink	59.3664	-135.8	45	0	1.06667	0	0.575926	0	1.19426
B52_18mile	18 mile Creek	pink	59.366	-135.8	36	0	1.66667	0	0.685185	0	1.71203
B47_BearFlats	Bear Flats	sockeye	59.493	-136.065	28	0	2.10714	0	1.14286	0	2.42857
B41_18mile_site2	18 mile Creek	pink	59.3634	-135.799	36	0	2.13889	0	1.25926	0	2.54496
B45_MuleMeadows	Mule Meadows	sockeye	59.546	-136.069	11	0	5.18182	0	1.69848	0	5.37359
B48_10mile	10 mile Creek	pink	59.2853	-135.681	4	0	7	0	8.05417	0	7.96651
B54_ChilkatFlats	Chilkat Flats	chum	59.3823	-135.861	11	0.0909091	0.454545	0.00151515	0.398485	0.0909091	0.461538
B42_Mule_Meadows	Mule Meadows	sockeye	59.5454	-136.07	10	0.1	14.1	0.0283333	8.18167	0.1	16.8165
B58_MuleMeadows	Mule Meadows	sockeye	59.5457	-136.069	11	0.181818	14.2727	0.00151515	8.34091	0.181818	15.3875
B50_TreeStandChilkoot	Chilkoot Lake	sockeye	59.337	-135.59	43	0.186047	2.11628	0.284884	1.27674	0.2	2.82739
B54_10mile	10 mile Creek	pink	59.2753	-135.671	12	0.25	7.58333	0.0402778	3.00694	0.25	8.17272
B49_HiddenCreekChilkoot	Chilkoot Lake	sockeye	59.3353	-135.588	47	0.276596	1.42553	0.533688	0.815957	0.276596	1.74814
B47_ChilkatFlatsForest	Chilkat Flats Forest	chum	59.3735	-135.849	12	0.25	1.91667	0.151389	0.669444	0.333333	2.61093
B41_chumTrapCreek	NSRAA Creek	chum	59.4153	-136.072	28	0.178571	3.03571	0.0434524	2.80179	0.34749	3.49091
B45_HermanCreek	Herman Creek	chum	59.4161	-136.062	39	0.487179	2.41026	0.473932	2.55598	0.487179	2.558
B46_chumTrapCreek	NSRAA Creek	chum	59.4148	-136.066	29	0.275862	6	0.13908	5.53793	0.517241	7.62581
B43_BearFlats	Bear Flats	sockeye	59.4933	-136.067	49	0.510204	3.08163	0.517007	2.31054	0.561224	3.11545
B60_MosquitoLake	Mosquito Lake	sockeye	59.4501	-136.027	25	0.72	1.52	0.819333	1.414	0.725714	1.94817
B44_MosquitoLake	Mosquito Lake	sockeye	59.4501	-136.027	28	0.75	1.21429	0.585119	1.675	0.75	1.62844
B56_TreeStandChilkoot	Chilkoot Lake	sockeye	59.3377	-135.59	14	0.857143	1.42857	0.195238	1.92738	0.857143	1.90816
B55_ChilkootTreeStand	Chilkoot Lake	sockeye	59.3377	-135.59	12	1.16667	4.25	0.798611	3.34722	1.16667	5.41666
B51_ChilkatFlats	Chilkat Flats	chum	59.3686	-135.849	4	0.75	0.75	0.025	0.129167	1.25	0.75
B53_HermanCreek	Herman Creek	chum	59.4165	-136.06	11	1.54545	1.90909	1.85152	1.20303	1.8419	2.43767
B59_HermanCreek	Herman Creek	chum	59.4148	-136.064	11	1.72727	2.63636	0.327273	2.53182	3.37013	2.99273
B51_KlehiniSteelBridge	Klehini Steel Bridge	chum	59.4141	-136.006	10	3.7	0	0.0916667	0	6.5	0
B52_ChilkatFlats	Chilkat Flats	chum	59.3856	-135.857	16	6	0.3125	2.36458	0.00833333	11.439	0.375
B42_ChilkatFlats	Chilkat Flats	chum	59.3817	-135.857	13	10.9231	1.61538	6.22692	0.691026	16.1934	2.04138
B43_ChilkatFlats	Chilkat Flats	chum	59.3906	-135.857	13	8.61538	1	12.891	0.688462	19.2153	1.10966
B44_ChilkatFlats	Chilkat Flats	chum	59.3724	-135.849	6	13	0.833333	9.89167	0.827778	21.9267	1.03216
B53_ChilkatFlats	Chilkat Flats	chum	59.3689	-135.849	7	12.5714	1.28571	9.51667	2.71905	22.4301	1.45551
B49_ChilkatFlats	Chilkat Flats	chum	59.383	-135.858	17	4.58824	0.352941	0.914706	0.0147059	24.8454	0.352941
B46_ChilkatFlats	Chilkat Flats	chum	59.3735	-135.849	7	12.1429	1	4.44048	0.152381	26.8101	1
B59_ChilkatFlats	Chilkat Flats	chum	59.368	-135.846	7	15.7143	0.428571	7.75714	0.0404762	37.2008	0.428571
B41_ChilkatFlats	Chilkat Flats	chum	59.3723	-135.841	7	15.2857	0.285714	12.3143	0.0690476	51.2716	0.339286
B55_ChilkatFlats	Chilkat Flats	chum	59.3845	-135.858	9	21.1111	1.11111	19.3963	0.0296296	51.3207	1.19444
B60_ChilkatFlats	Chilkat Flats	chum	59.368	-135.846	7	20.2857	0.428571	22.3833	0.419048	54.5751	0.428571
B56_ChilkatFlats	Chilkat Flats	chum	NA	NA	13	32.7692	4.30769	14.2269	1.46667	157.959	5.41552
