# Supplementary material for: Differential use of salmon by vertebrate consumers: implications for conservation
Source: PeerJ. 2015 Aug 4;3:e1157. doi: 10.7717/peerj.1157 (PMC4558068; doi:10.7717/peerj.1157)
Supplement: Supplemental Information 3 [file peerj-03-1157-s003.xlsx]

## Sheet: Sheet2
Count of Animal	Column Labels
Row Labels	bear	black bear	brown bear	car	coyote	dog	grouse	human	lynx	moose	porcupine	snowshoe hare	squirrel	wolf	(blank)	Grand Total
B42		1			6			1				1	2			11
B43		5	1							4						10
B44	1	5	6	1	3											16
B45		12		69						2		1				84
B46	1	13	2	18	9			1		4						48
B47		5								8						13
B48		6		10	3			3	1	2						25
B49		4		18	2					1	1	2				28
B50		8		27	3	2				2		2				44
B51		1				4		8								13
B52		2		29		1				2		2				36
B53				1												1
B54		2	3	2	1			1	1	5				1		16
B55		4		13	10	1		1								29
B56			1		3	4		8								16
B57		6	2	11	1	2		3		2						27
B58		3	1	5	1			2	1			13	4	3		33
B60		6	5				2			3						16
Grand Total	2	83	21	204	42	14	2	28	3	35	1	21	6	4		466
		3.46831
Row Labels	bear	black bear	brown bear	car	coyote	dog	grouse	human	lynx	moose	porcupine	snowshoe hare	squirrel	wolf
B42	0	1	0	0	6	0	0	1	0	0	0	1	2	0
B43	0	5	1	0	0	0	0	0	0	4	0	0	0	0
B44	1	5	6	1	3	0	0	0	0	0	0	0	0	0
B45	0	12	0	69	0	0	0	0	0	2	0	1	0	0
B46	1	13	2	18	9	0	0	1	0	4	0	0	0	0
B47	0	5	0	0	0	0	0	0	0	8	0	0	0	0
B48	0	6	0	10	3	0	0	3	1	2	0	0	0	0
B49	0	4	0	18	2	0	0	0	0	1	1	2	0	0
B50	0	8	0	27	3	2	0	0	0	2	0	2	0	0
B51	0	1	0	0	0	4	0	8	0	0	0	0	0	0
B52	0	2	0	29	0	1	0	0	0	2	0	2	0	0
B53	0	0	0	1	0	0	0	0	0	0	0	0	0	0
B54	0	2	3	2	1	0	0	1	1	5	0	0	0	1
B55	0	4	0	13	10	1	0	1	0	0	0	0	0	0
B56	0	0	1	0	3	4	0	8	0	0	0	0	0	0
B57	0	6	2	11	1	2	0	3	0	2	0	0	0	0
B58	0	3	1	5	1	0	0	2	1	0	0	13	4	3
B60	0	6	5	0	0	0	2	0	0	3	0	0	0	0
Grand Total	2	83	21	204	42	14	2	28	3	35	1	21	6	4
StDev	0.323381	3.66444	1.82305	17.3001	3.08697	1.3528	0.471405	2.54887	0.383482	2.20887	0.235702	3.05345	1.02899	0.732084
StError	0.0762216	0.863716	0.429698	4.07768	0.727607	0.318858	0.111111	0.600774	0.0903877	0.520634	0.0555556	0.719704	0.242536	0.172554

## Sheet: Sheet1
Cam ID	Date Set	Approx Site	Latitude	Longitude	Date Checked	Cam Status	Animal	Status	Date	Time	PhotoID
B42	2011-07-01	Mosq LK FS L1	N59 27.640'	W136 02.494'	2011-07-09	Keep	coyote		2011-07-02	2000	B42_1
B42	2011-07-01	Mosq LK FS L1	N59 27.640'	W136 02.494'	2011-07-09	Keep	coyote		2011-07-03	0940	B42_2
B42	2011-07-01	Mosq LK FS L1	N59 27.640'	W136 02.494'	2011-07-09	Keep	human		2011-07-07	1051	B42_3
B42	2011-07-09	Mosq LK FS L1	N59 27.640'	W136 02.494'	2011-07-24	keep	coyote		2011-07-16	0118	B42_4
B42	2011-07-24	Mosq LK FS L1	N59 27.640'	W136 02.494'	2011-08-06	keep	snowshoe hare		2011-07-30	0853	B42_5
B42	2011-07-24	Mosq LK FS L1	N59 27.640'	W136 02.494'	2011-08-06	keep	black bear		2011-08-01	1904	B42_6
B42	2011-08-06	Mosq LK FS L1	N59 27.640'	W136 02.494'	2011-08-12	Remove	coyote		2011-08-07	1211	B42_7
B42	2011-08-06	Mosq LK FS L1	N59 27.640'	W136 02.494'	2011-08-12	Remove	squirrel		2011-08-09	0515	B42_8
B42	2011-08-06	Mosq LK FS L1	N59 27.640'	W136 02.494'	2011-08-12	Remove	squirrel		2011-08-09	0854	B42_9
B42	2011-08-06	Mosq LK FS L1	N59 27.640'	W136 02.494'	2011-08-12	Remove	coyote		2011-08-09	1017	B42_10
B42	2011-08-06	Mosq LK FS L1	N59 27.640'	W136 02.494'	2011-08-12	Remove	coyote		2011-08-12	1232	B42_11
B43	2011-07-09	Mosq LK FS L2	N59 31.529	W136 05.728	2011-07-20	keep	black bear		2011-07-17	1214	B43_1
B43	2011-07-09	Mosq LK FS L2	N59 31.529	W136 05.728	2011-07-20	keep	brown bear		2011-07-18	1344	B43_2
B43	2011-07-20	Mosq LK FS L2	N59 31.529	W136 05.728	2011-08-04	keep	moose	cow	2011-07-23	0315	B43_3
B43	2011-07-20	Mosq LK FS L2	N59 31.529	W136 05.728	2011-08-04	keep	moose	calf	2011-07-23	0315	B43_4
B43	2011-07-20	Mosq LK FS L2	N59 31.529	W136 05.728	2011-08-04	keep	moose	calf	2011-07-23	0315	B43_5
B43	2011-07-20	Mosq LK FS L2	N59 31.529	W136 05.728	2011-08-04	keep	black bear		2011-08-01	1842	B43_6
B43	2011-07-20	Mosq LK FS L2	N59 31.529	W136 05.728	2011-08-04	keep	black bear		2011-08-02	1714	B43_7
B43	2011-07-20	Mosq LK FS L2	N59 31.529	W136 05.728	2011-08-04	keep	black bear		2011-08-03	1216	B43_8
B43	2011-08-04	Mosq LK FS L2	N59 31.529	W136 05.728	2011-08-19	Remove	black bear		2011-08-05	2218	B43_9
B43	2011-08-04	Mosq LK FS L2	N59 31.529	W136 05.728	2011-08-19	Remove	moose	cow	2011-08-09	0416	B43_10
B44	2011-07-09	Mosq LK FS L1	N59 27.735'	W136 02.479'	2011-07-24	Keep	black bear		2011-07-11	0744	B44_1
B44	2011-07-09	Mosq LK FS L1	N59 27.735'	W136 02.479'	2011-07-24	Keep	brown bear	sow	2011-07-12	1614	B44_2
B44	2011-07-09	Mosq LK FS L1	N59 27.735'	W136 02.479'	2011-07-24	Keep	brown bear	cub	2011-07-12	1614	B44_3
B44	2011-07-09	Mosq LK FS L1	N59 27.735'	W136 02.479'	2011-07-24	Keep	brown bear	cub	2011-07-12	1614	B44_4
B44	2011-07-09	Mosq LK FS L1	N59 27.735'	W136 02.479'	2011-07-24	Keep	car		2011-07-13	1952	B44_5
B44	2011-07-09	Mosq LK FS L1	N59 27.735'	W136 02.479'	2011-07-24	Keep	black bear		2011-07-15	1923	B44_6
B44	2011-07-09	Mosq LK FS L1	N59 27.735'	W136 02.479'	2011-07-24	Keep	brown bear		2011-07-24	1145	B44_7
B44	2011-07-24	Mosq LK FS L1	N59 27.735'	W136 02.479'	2011-08-06	keep	black bear		2011-07-25	1650	B44_8
B44	2011-07-24	Mosq LK FS L1	N59 27.735'	W136 02.479'	2011-08-06	keep	brown bear		2011-07-28	2051	B44_9
B44	2011-07-24	Mosq LK FS L1	N59 27.735'	W136 02.479'	2011-08-06	keep	brown bear		2011-08-03	0838	B44_10
B44	2011-07-24	Mosq LK FS L1	N59 27.735'	W136 02.479'	2011-08-06	keep	coyote		2011-08-06	0914	B44_11
B44	2011-08-06	Mosq LK FS L1	N59 27.735'	W136 02.479'	2011-08-19	Remove	coyote		2011-08-07	1604	B44_12
B44	2011-08-06	Mosq LK FS L1	N59 27.735'	W136 02.479'	2011-08-19	Remove	black bear		2011-08-07	1709	B44_13
B44	2011-08-06	Mosq LK FS L1	N59 27.735'	W136 02.479'	2011-08-19	Remove	bear	unknown	2011-08-07	2217	B44_14
B44	2011-08-06	Mosq LK FS L1	N59 27.735'	W136 02.479'	2011-08-19	Remove	black bear		2011-08-08	1100	B44_15
B44	2011-08-06	Mosq LK FS L1	N59 27.735'	W136 02.479'	2011-08-19	Remove	coyote		2011-08-14	2001	B44_16
B45	2011-07-11	Kelsall Vlly Rd	N59 34.071	W136 08.989	2011-07-20	Keep	car		2011-07-12	0627	B45_1
B45	2011-07-11	Kelsall Vlly Rd	N59 34.071	W136 08.989	2011-07-20	Keep	car		2011-07-12	1426	B45_2
B45	2011-07-11	Kelsall Vlly Rd	N59 34.071	W136 08.989	2011-07-20	Keep	car		2011-07-13	1208	B45_3
B45	2011-07-11	Kelsall Vlly Rd	N59 34.071	W136 08.989	2011-07-20	Keep	car		2011-07-13	1908	B45_4
B45	2011-07-11	Kelsall Vlly Rd	N59 34.071	W136 08.989	2011-07-20	Keep	car		2011-07-13	2249	B45_5
B45	2011-07-11	Kelsall Vlly Rd	N59 34.071	W136 08.989	2011-07-20	Keep	car		2011-07-15	1308	B45_6
B45	2011-07-11	Kelsall Vlly Rd	N59 34.071	W136 08.989	2011-07-20	Keep	car		2011-07-17	1406	B45_7
B45	2011-07-11	Kelsall Vlly Rd	N59 34.071	W136 08.989	2011-07-20	Keep	black bear		2011-07-17	1551	B45_8
B45	2011-07-11	Kelsall Vlly Rd	N59 34.071	W136 08.989	2011-07-20	Keep	car		2011-07-17	1845	B45_9
B45	2011-07-11	Kelsall Vlly Rd	N59 34.071	W136 08.989	2011-07-20	Keep	black bear		2011-07-20	0738	B45_10
B45	2011-07-20	Kelsall Vlly Rd	N59 34.071	W136 08.989	2011-08-04	keep	car		2011-07-23	0850	B45_11
B45	2011-07-20	Kelsall Vlly Rd	N59 34.071	W136 08.989	2011-08-04	keep	car		2011-07-23	1015	B45_12
B45	2011-07-20	Kelsall Vlly Rd	N59 34.071	W136 08.989	2011-08-04	keep	car		2011-07-23	1017	B45_13
B45	2011-07-20	Kelsall Vlly Rd	N59 34.071	W136 08.989	2011-08-04	keep	car		2011-07-23	1352	B45_14
B45	2011-07-20	Kelsall Vlly Rd	N59 34.071	W136 08.989	2011-08-04	keep	car		2011-07-23	1703	B45_15
B45	2011-07-20	Kelsall Vlly Rd	N59 34.071	W136 08.989	2011-08-04	keep	car		2011-07-24	1049	B45_16
B45	2011-07-20	Kelsall Vlly Rd	N59 34.071	W136 08.989	2011-08-04	keep	car		2011-07-24	1243	B45_17
B45	2011-07-20	Kelsall Vlly Rd	N59 34.071	W136 08.989	2011-08-04	keep	car		2011-07-24	1729	B45_18
B45	2011-07-20	Kelsall Vlly Rd	N59 34.071	W136 08.989	2011-08-04	keep	car		2011-07-25	1406	B45_19
B45	2011-07-20	Kelsall Vlly Rd	N59 34.071	W136 08.989	2011-08-04	keep	car		2011-07-25	1558	B45_20
B45	2011-07-20	Kelsall Vlly Rd	N59 34.071	W136 08.989	2011-08-04	keep	car		2011-07-25	1558	B45_21
B45	2011-07-20	Kelsall Vlly Rd	N59 34.071	W136 08.989	2011-08-04	keep	black bear		2011-07-26	1604	B45_22
B45	2011-07-20	Kelsall Vlly Rd	N59 34.071	W136 08.989	2011-08-04	keep	car		2011-07-27	1740	B45_23
B45	2011-07-20	Kelsall Vlly Rd	N59 34.071	W136 08.989	2011-08-04	keep	car		2011-07-27	1854	B45_24
B45	2011-07-20	Kelsall Vlly Rd	N59 34.071	W136 08.989	2011-08-04	keep	black bear		2011-07-28	0712	B45_25
B45	2011-07-20	Kelsall Vlly Rd	N59 34.071	W136 08.989	2011-08-04	keep	black bear		2011-07-28	1054	B45_26
B45	2011-07-20	Kelsall Vlly Rd	N59 34.071	W136 08.989	2011-08-04	keep	car		2011-07-28	1445	B45_27
B45	2011-07-20	Kelsall Vlly Rd	N59 34.071	W136 08.989	2011-08-04	keep	black bear		2011-07-28	1714	B45_28
B45	2011-07-20	Kelsall Vlly Rd	N59 34.071	W136 08.989	2011-08-04	keep	car		2011-07-28	1833	B45_30
B45	2011-07-20	Kelsall Vlly Rd	N59 34.071	W136 08.989	2011-08-04	keep	car		2011-07-28	1908	B45_31
B45	2011-07-20	Kelsall Vlly Rd	N59 34.071	W136 08.989	2011-08-04	keep	moose	bull	2011-07-29	0901	B45_33
B45	2011-07-20	Kelsall Vlly Rd	N59 34.071	W136 08.989	2011-08-04	keep	black bear		2011-07-29	0958	B45_34
B45	2011-07-20	Kelsall Vlly Rd	N59 34.071	W136 08.989	2011-08-04	keep	black bear		2011-07-29	2145	B45_35
B45	2011-07-20	Kelsall Vlly Rd	N59 34.071	W136 08.989	2011-08-04	keep	car		2011-07-31	1306	B45_36
B45	2011-07-20	Kelsall Vlly Rd	N59 34.071	W136 08.989	2011-08-04	keep	car		2011-07-31	1323	B45_37
B45	2011-07-20	Kelsall Vlly Rd	N59 34.071	W136 08.989	2011-08-04	keep	car		2011-07-31	1323	B45_38
B45	2011-07-20	Kelsall Vlly Rd	N59 34.071	W136 08.989	2011-08-04	keep	car		2011-07-31	1428	B45_40
B45	2011-07-20	Kelsall Vlly Rd	N59 34.071	W136 08.989	2011-08-04	keep	black bear		2011-08-01	0646	B45_41
B45	2011-07-20	Kelsall Vlly Rd	N59 34.071	W136 08.989	2011-08-04	keep	car		2011-08-01	1604	B45_42
B45	2011-07-20	Kelsall Vlly Rd	N59 34.071	W136 08.989	2011-08-04	keep	car		2011-08-01	1721	B45_43
B45	2011-07-20	Kelsall Vlly Rd	N59 34.071	W136 08.989	2011-08-04	keep	black bear		2011-08-01	1750	B45_44
B45	2011-07-20	Kelsall Vlly Rd	N59 34.071	W136 08.989	2011-08-04	keep	car		2011-08-01	2154	B45_46
B45	2011-07-20	Kelsall Vlly Rd	N59 34.071	W136 08.989	2011-08-04	keep	car		2011-08-02	1412	B45_47
B45	2011-07-20	Kelsall Vlly Rd	N59 34.071	W136 08.989	2011-08-04	keep	car		2011-08-02	1652	B45_48
B45	2011-07-20	Kelsall Vlly Rd	N59 34.071	W136 08.989	2011-08-04	keep	car		2011-08-04	0815	B45_49
B45	2011-07-20	Kelsall Vlly Rd	N59 34.071	W136 08.989	2011-08-04	keep	car		2011-08-04	0851	B45_50
B45	2011-07-20	Kelsall Vlly Rd	N59 34.071	W136 08.989	2011-08-04	keep	car		2011-08-04	1225	B45_51
B45	2011-07-20	Kelsall Vlly Rd	N59 34.071	W136 08.989	2011-08-04	keep	car		2011-08-04	1225	B45_52
B45	2011-07-20	Kelsall Vlly Rd	N59 34.071	W136 08.989	2011-08-04	keep	car		2011-08-04	1226	B45_53
B45	2011-08-04	Kelsall Vlly Rd	N59 34.071	W136 08.989	2011-08-19	Remove	car		2011-08-05	1517	B45_54
B45	2011-08-04	Kelsall Vlly Rd	N59 34.071	W136 08.989	2011-08-19	Remove	car		2011-08-05	1517	B45_55
B45	2011-08-04	Kelsall Vlly Rd	N59 34.071	W136 08.989	2011-08-19	Remove	car		2011-08-05	1518	B45_56
B45	2011-08-04	Kelsall Vlly Rd	N59 34.071	W136 08.989	2011-08-19	Remove	car		2011-08-05	0726	B45_57
B45	2011-08-04	Kelsall Vlly Rd	N59 34.071	W136 08.989	2011-08-19	Remove	car		2011-08-05	0816	B45_58
B45	2011-08-04	Kelsall Vlly Rd	N59 34.071	W136 08.989	2011-08-19	Remove	car		2011-08-06	1416	B45_59
B45	2011-08-04	Kelsall Vlly Rd	N59 34.071	W136 08.989	2011-08-19	Remove	car		2011-08-06	1721	B45_60
B45	2011-08-04	Kelsall Vlly Rd	N59 34.071	W136 08.989	2011-08-19	Remove	car		2011-08-07	1232	B45_61
B45	2011-08-04	Kelsall Vlly Rd	N59 34.071	W136 08.989	2011-08-19	Remove	car		2011-08-07	1334	B45_62
B45	2011-08-04	Kelsall Vlly Rd	N59 34.071	W136 08.989	2011-08-19	Remove	car		2011-08-07	1359	B45_63
B45	2011-08-04	Kelsall Vlly Rd	N59 34.071	W136 08.989	2011-08-19	Remove	car		2011-08-07	1538	B45_64
B45	2011-08-04	Kelsall Vlly Rd	N59 34.071	W136 08.989	2011-08-19	Remove	car		2011-08-07	1623	B45_65
B45	2011-08-04	Kelsall Vlly Rd	N59 34.071	W136 08.989	2011-08-19	Remove	car		2011-08-07	1624	B45_66
B45	2011-08-04	Kelsall Vlly Rd	N59 34.071	W136 08.989	2011-08-19	Remove	car		2011-08-08	0813	B45_67
B45	2011-08-04	Kelsall Vlly Rd	N59 34.071	W136 08.989	2011-08-19	Remove	car		2011-08-08	1108	B45_68
B45	2011-08-04	Kelsall Vlly Rd	N59 34.071	W136 08.989	2011-08-19	Remove	car		2011-08-09	0810	B45_69
B45	2011-08-04	Kelsall Vlly Rd	N59 34.071	W136 08.989	2011-08-19	Remove	car		2011-08-09	0924	B45_70
B45	2011-08-04	Kelsall Vlly Rd	N59 34.071	W136 08.989	2011-08-19	Remove	car		2011-08-09	1126	B45_71
B45	2011-08-04	Kelsall Vlly Rd	N59 34.071	W136 08.989	2011-08-19	Remove	car		2011-08-09	1501	B45_72
B45	2011-08-04	Kelsall Vlly Rd	N59 34.071	W136 08.989	2011-08-19	Remove	snowshoe hare		2011-08-10	0233	B45_73
B45	2011-08-04	Kelsall Vlly Rd	N59 34.071	W136 08.989	2011-08-19	Remove	car		2011-08-10	1034	B45_74
B45	2011-08-04	Kelsall Vlly Rd	N59 34.071	W136 08.989	2011-08-19	Remove	car		2011-08-10	1421	B45_75
B45	2011-08-04	Kelsall Vlly Rd	N59 34.071	W136 08.989	2011-08-19	Remove	car		2011-08-10	1421	B45_76
B45	2011-08-04	Kelsall Vlly Rd	N59 34.071	W136 08.989	2011-08-19	Remove	moose	bull	2011-08-11	0028	B45_77
B45	2011-08-04	Kelsall Vlly Rd	N59 34.071	W136 08.989	2011-08-19	Remove	car		2011-08-11	1805	B45_78
B45	2011-08-04	Kelsall Vlly Rd	N59 34.071	W136 08.989	2011-08-19	Remove	black bear		2011-08-11	1958	B45_79
B45	2011-08-04	Kelsall Vlly Rd	N59 34.071	W136 08.989	2011-08-19	Remove	car		2011-08-13	1443	B45_80
B45	2011-08-04	Kelsall Vlly Rd	N59 34.071	W136 08.989	2011-08-19	Remove	car		2011-08-14	1111	B45_81
B45	2011-08-04	Kelsall Vlly Rd	N59 34.071	W136 08.989	2011-08-19	Remove	car		2011-08-14	1323	B45_82
B45	2011-08-04	Kelsall Vlly Rd	N59 34.071	W136 08.989	2011-08-19	Remove	car		2011-08-14	1603	B45_83
B45	2011-08-04	Kelsall Vlly Rd	N59 34.071	W136 08.989	2011-08-19	Remove	car		2011-08-15	0817	B45_84
B45	2011-08-04	Kelsall Vlly Rd	N59 34.071	W136 08.989	2011-08-19	Remove	car		2011-08-17	1036	B45_85
B45	2011-08-04	Kelsall Vlly Rd	N59 34.071	W136 08.989	2011-08-19	Remove	black bear		2011-08-18	0600	B45_86
B45	2011-08-04	Kelsall Vlly Rd	N59 34.071	W136 08.989	2011-08-19	Remove	car		2011-08-18	0826	B45_87
B45	2011-08-04	Kelsall Vlly Rd	N59 34.071	W136 08.989	2011-08-19	Remove	car		2011-08-18	1314	B45_88
B46	2011-07-09	Mosq LK FS R1	N59 31.821	W136 04.050	2011-07-20	keep	car		2011-07-10	1556	B46_1
B46	2011-07-09	Mosq LK FS R1	N59 31.821	W136 04.050	2011-07-20	keep	car		2011-07-10	1620	B46_2
B46	2011-07-09	Mosq LK FS R1	N59 31.821	W136 04.050	2011-07-20	keep	coyote		2011-07-11	2227	B46_3
B46	2011-07-09	Mosq LK FS R1	N59 31.821	W136 04.050	2011-07-20	keep	car		2011-07-13	2145	B46_4
B46	2011-07-09	Mosq LK FS R1	N59 31.821	W136 04.050	2011-07-20	keep	car		2011-07-13	2311	B46_5
B46	2011-07-09	Mosq LK FS R1	N59 31.821	W136 04.050	2011-07-20	keep	black bear		2011-07-14	1359	B46_6
B46	2011-07-09	Mosq LK FS R1	N59 31.821	W136 04.050	2011-07-20	keep	coyote		2011-07-17	0230	B46_7
B46	2011-07-09	Mosq LK FS R1	N59 31.821	W136 04.050	2011-07-20	keep	brown bear		2011-07-17	0832	B46_8
B46	2011-07-09	Mosq LK FS R1	N59 31.821	W136 04.050	2011-07-20	keep	black bear		2011-07-17	1100	B46_9
B46	2011-07-09	Mosq LK FS R1	N59 31.821	W136 04.050	2011-07-20	keep	brown bear		2011-07-18	0635	B46_10
B46	2011-07-09	Mosq LK FS R1	N59 31.821	W136 04.050	2011-07-20	keep	moose	bull	2011-07-18	1218	B46_11
B46	2011-07-09	Mosq LK FS R1	N59 31.821	W136 04.050	2011-07-20	keep	moose	cow	2011-07-18	1219	B46_12
B46	2011-07-09	Mosq LK FS R1	N59 31.821	W136 04.050	2011-07-20	keep	moose	bull	2011-07-18	1826	B46_13
B46	2011-07-09	Mosq LK FS R1	N59 31.821	W136 04.050	2011-07-20	keep	black bear		2011-07-19	1733	B46_14
B46	2011-07-20	Mosq LK FS R1	N59 31.821	W136 04.050	2011-08-12	keep	black bear		2011-07-21	0513	B46_15
B46	2011-07-20	Mosq LK FS R1	N59 31.821	W136 04.050	2011-08-12	keep	black bear		2011-07-21	0641	B46_16
B46	2011-07-20	Mosq LK FS R1	N59 31.821	W136 04.050	2011-08-12	keep	car		2011-07-21	1659	B46_17
B46	2011-07-20	Mosq LK FS R1	N59 31.821	W136 04.050	2011-08-12	keep	car		2011-07-21	1659	B46_18
B46	2011-07-20	Mosq LK FS R1	N59 31.821	W136 04.050	2011-08-12	keep	car		2011-07-24	1754	B46_19
B46	2011-07-20	Mosq LK FS R1	N59 31.821	W136 04.050	2011-08-12	keep	moose	unknown	2011-07-24	2247	B46_20
B46	2011-07-20	Mosq LK FS R1	N59 31.821	W136 04.050	2011-08-12	keep	coyote		2011-07-25	2232	B46_21
B46	2011-07-20	Mosq LK FS R1	N59 31.821	W136 04.050	2011-08-12	keep	black bear		2011-07-27	0758	B46_22
B46	2011-07-20	Mosq LK FS R1	N59 31.821	W136 04.050	2011-08-12	keep	coyote		2011-07-28	0434	B46_23
B46	2011-07-20	Mosq LK FS R1	N59 31.821	W136 04.050	2011-08-12	keep	coyote		2011-07-28	0840	B46_24
B46	2011-07-20	Mosq LK FS R1	N59 31.821	W136 04.050	2011-08-12	keep	coyote		2011-07-30	0550	B46_25
B46	2011-07-20	Mosq LK FS R1	N59 31.821	W136 04.050	2011-08-12	keep	car		2011-07-31	1451	B46_26
B46	2011-07-20	Mosq LK FS R1	N59 31.821	W136 04.050	2011-08-12	keep	black bear		2011-07-31	1906	B46_27
B46	2011-07-20	Mosq LK FS R1	N59 31.821	W136 04.050	2011-08-12	keep	car		2011-08-01	1250	B46_28
B46	2011-07-20	Mosq LK FS R1	N59 31.821	W136 04.050	2011-08-12	keep	black bear		2011-08-01	1850	B46_29
B46	2011-07-20	Mosq LK FS R1	N59 31.821	W136 04.050	2011-08-12	keep	car		2011-08-03	0907	B46_30
B46	2011-07-20	Mosq LK FS R1	N59 31.821	W136 04.050	2011-08-12	keep	black bear		2011-08-04	1245	B46_31
B46	2011-07-20	Mosq LK FS R1	N59 31.821	W136 04.050	2011-08-12	keep	car		2011-08-04	1413	B46_32
B46	2011-07-20	Mosq LK FS R1	N59 31.821	W136 04.050	2011-08-12	keep	coyote		2011-08-05	0933	B46_33
B46	2011-07-20	Mosq LK FS R1	N59 31.821	W136 04.050	2011-08-12	keep	car		2011-08-06	1155	B46_34
B46	2011-07-20	Mosq LK FS R1	N59 31.821	W136 04.050	2011-08-12	keep	car		2011-08-06	1155	B46_35
B46	2011-07-20	Mosq LK FS R1	N59 31.821	W136 04.050	2011-08-12	keep	car		2011-08-07	1431	B46_36
B46	2011-07-20	Mosq LK FS R1	N59 31.821	W136 04.050	2011-08-12	keep	car		2011-08-07	1431	B46_37
B46	2011-07-20	Mosq LK FS R1	N59 31.821	W136 04.050	2011-08-12	keep	coyote		2011-08-10	1034	B46_38
B46	2011-07-20	Mosq LK FS R1	N59 31.821	W136 04.050	2011-08-12	keep	car		2011-08-10	1232	B46_39
B46	2011-07-20	Mosq LK FS R1	N59 31.821	W136 04.050	2011-08-12	keep	black bear		2011-08-11	0710	B46_40
B46	2011-08-12	Mosq LK FS R1	N59 31.821	W136 04.050	2011-08-19	Remove	car		2011-08-14	1249	B46_41
B46	2011-08-12	Mosq LK FS R1	N59 31.821	W136 04.050	2011-08-19	Remove	black bear		2011-08-16	0433	B46_42
B46	2011-08-12	Mosq LK FS R1	N59 31.821	W136 04.050	2011-08-19	Remove	coyote		2011-08-16	2021	B46_43
B46	2011-08-12	Mosq LK FS R1	N59 31.821	W136 04.050	2011-08-19	Remove	black bear		2011-08-17	0637	B46_44
B46	2011-08-12	Mosq LK FS R1	N59 31.821	W136 04.050	2011-08-19	Remove	bear	unknown	2011-08-19	0314	B46_45
B46	2011-08-12	Mosq LK FS R1	N59 31.821	W136 04.050	2011-08-19	Remove	black bear		2011-08-19	0543	B46_46
B46	2011-08-12	Mosq LK FS R1	N59 31.821	W136 04.050	2011-08-19	Remove	car		2011-08-19	1337	B46_47
B46	2011-08-12	Mosq LK FS R1	N59 31.821	W136 04.050	2011-08-19	Remove	human		2011-08-19	1436	B46_48
B47	2011-07-09	Mosq LK FS	N59 30.843	W136 05.561'	2011-07-20	keep	black bear		2011-07-10	1519	B47_1
B47	2011-07-09	Mosq LK FS	N59 30.843	W136 05.561'	2011-07-20	keep	black bear		2011-07-10	1649	B47_2
B47	2011-07-09	Mosq LK FS	N59 30.843	W136 05.561'	2011-07-20	keep	moose	cow	2011-07-19	0325	B47_3
B47	2011-07-09	Mosq LK FS	N59 30.843	W136 05.561'	2011-07-20	keep	moose	calf	2011-07-19	0325	B47_4
B47	2011-07-09	Mosq LK FS	N59 30.843	W136 05.561'	2011-07-20	keep	moose	calf	2011-07-19	0325	B47_5
B47	2011-07-09	Mosq LK FS	N59 30.843	W136 05.561'	2011-07-20	keep	moose	bull	2011-07-19	0357	B47_6
B47	2011-07-09	Mosq LK FS	N59 30.843	W136 05.561'	2011-07-20	keep	black bear		2011-07-19	1142	B47_7
B47	2011-07-20	Mosq LK FS	N59 30.843	W136 05.561'	2011-07-30	keep	moose	cow	2011-07-21	2045	B47_8
B47	2011-07-20	Mosq LK FS	N59 30.843	W136 05.561'	2011-07-30	keep	moose	cow	2011-07-22	0521	B47_9
B47	2011-07-20	Mosq LK FS	N59 30.843	W136 05.561'	2011-07-30	keep	moose	calf	2011-07-22	0521	B47_10
B47	2011-07-20	Mosq LK FS	N59 30.843	W136 05.561'	2011-07-30	keep	black bear		2011-07-30	1055	B47_11
B47	2011-08-04	Mosq LK FS	N59 30.843	W136 05.561'	2011-08-19	Remove	black bear		2011-08-05	0407	B47_12
B47	2011-08-04	Mosq LK FS	N59 30.843	W136 05.561'	2011-08-19	Remove	moose	cow	2011-08-17	2315	B47_13
B48	2011-07-09	Mosq LK FS R1	N59 31.613	W136 04.124	2011-07-20	keep	car		2011-07-13	2312	B48_1
B48	2011-07-09	Mosq LK FS R1	N59 31.613	W136 04.124	2011-07-20	keep	black bear		2011-07-15	0726	B48_2
B48	2011-07-20	Mosq LK FS R1	N59 31.613	W136 04.124	2011-08-12	Remove	black bear		2011-07-20	2126	B48_3
B48	2011-07-20	Mosq LK FS R1	N59 31.613	W136 04.124	2011-08-12	Remove	car		2011-07-21	1656	B48_4
B48	2011-07-20	Mosq LK FS R1	N59 31.613	W136 04.124	2011-08-12	Remove	car		2011-07-24	1752	B48_5
B48	2011-07-20	Mosq LK FS R1	N59 31.613	W136 04.124	2011-08-12	Remove	black bear		2011-07-25	0545	B48_6
B48	2011-07-20	Mosq LK FS R1	N59 31.613	W136 04.124	2011-08-12	Remove	moose	cow	2011-07-25	1213	B48_7
B48	2011-07-20	Mosq LK FS R1	N59 31.613	W136 04.124	2011-08-12	Remove	coyote		2011-07-26	2208	B48_8
B48	2011-07-20	Mosq LK FS R1	N59 31.613	W136 04.124	2011-08-12	Remove	human		2011-07-28	1518	B48_9
B48	2011-07-20	Mosq LK FS R1	N59 31.613	W136 04.124	2011-08-12	Remove	human		2011-07-28	1518	B48_10
B48	2011-07-20	Mosq LK FS R1	N59 31.613	W136 04.124	2011-08-12	Remove	human		2011-07-28	1526	B48_11
B48	2011-07-20	Mosq LK FS R1	N59 31.613	W136 04.124	2011-08-12	Remove	car		2011-07-31	1449	B48_12
B48	2011-07-20	Mosq LK FS R1	N59 31.613	W136 04.124	2011-08-12	Remove	car		2011-07-31	1548	B48_13
B48	2011-07-20	Mosq LK FS R1	N59 31.613	W136 04.124	2011-08-12	Remove	car		2011-08-01	1548	B48_14
B48	2011-07-20	Mosq LK FS R1	N59 31.613	W136 04.124	2011-08-12	Remove	black bear		2011-08-01	1858	B48_15
B48	2011-07-20	Mosq LK FS R1	N59 31.613	W136 04.124	2011-08-12	Remove	moose	bull	2011-08-02	1044	B48_16
B48	2011-07-20	Mosq LK FS R1	N59 31.613	W136 04.124	2011-08-12	Remove	black bear		2011-08-04	0535	B48_17
B48	2011-07-20	Mosq LK FS R1	N59 31.613	W136 04.124	2011-08-12	Remove	car		2011-08-04	1428	B48_18
B48	2011-07-20	Mosq LK FS R1	N59 31.613	W136 04.124	2011-08-12	Remove	coyote		2011-08-05	0902	B48_19
B48	2011-07-20	Mosq LK FS R1	N59 31.613	W136 04.124	2011-08-12	Remove	black bear		2011-08-05	2031	B48_20
B48	2011-07-20	Mosq LK FS R1	N59 31.613	W136 04.124	2011-08-12	Remove	car		2011-08-06	1153	B48_21
B48	2011-07-20	Mosq LK FS R1	N59 31.613	W136 04.124	2011-08-12	Remove	car		2011-08-07	1429	B48_22
B48	2011-07-20	Mosq LK FS R1	N59 31.613	W136 04.124	2011-08-12	Remove	car		2011-08-07	1430	B48_23
B48	2011-07-20	Mosq LK FS R1	N59 31.613	W136 04.124	2011-08-12	Remove	lynx		2011-08-08	0237	B48_24
B48	2011-07-20	Mosq LK FS R1	N59 31.613	W136 04.124	2011-08-12	Remove	coyote		2011-08-10	1041	B48_25
B49	2011-07-11	Kelsall Vlly Rd	N59 33.232	W136 08.119	2011-07-20	Keep	car		2011-07-13	2240	B49_2
B49	2011-07-11	Kelsall Vlly Rd	N59 33.232	W136 08.119	2011-07-20	Keep	porcupine		2011-07-13	0037	B49_1
B49	2011-07-11	Kelsall Vlly Rd	N59 33.232	W136 08.119	2011-07-20	Keep	car		2011-07-15	1152	B49_3
B49	2011-07-11	Kelsall Vlly Rd	N59 33.232	W136 08.119	2011-07-20	Keep	moose	cow	2011-07-18	0710	B49_4
B49	2011-07-11	Kelsall Vlly Rd	N59 33.232	W136 08.119	2011-07-20	Keep	coyote		2011-07-19	0639	B49_5
B49	2011-07-20	Kelsall Vlly Rd	N59 33.232	W136 08.119	2011-08-04	Keep	car		2011-07-23	1657	B49_6
B49	2011-07-20	Kelsall Vlly Rd	N59 33.232	W136 08.119	2011-08-04	Keep	car		2011-07-24	1233	B49_7
B49	2011-07-20	Kelsall Vlly Rd	N59 33.232	W136 08.119	2011-08-04	Keep	car		2011-07-25	1356	B49_8
B49	2011-07-20	Kelsall Vlly Rd	N59 33.232	W136 08.119	2011-08-04	Keep	car		2011-07-25	1553	B49_9
B49	2011-07-20	Kelsall Vlly Rd	N59 33.232	W136 08.119	2011-08-04	Keep	coyote		2011-07-26	2103	B49_10
B49	2011-07-20	Kelsall Vlly Rd	N59 33.232	W136 08.119	2011-08-04	Keep	car		2011-07-27	1730	B49_11
B49	2011-07-20	Kelsall Vlly Rd	N59 33.232	W136 08.119	2011-08-04	Keep	car		2011-07-27	1845	B49_12
B49	2011-07-20	Kelsall Vlly Rd	N59 33.232	W136 08.119	2011-08-04	Keep	car		2011-07-28	1815	B49_13
B49	2011-07-20	Kelsall Vlly Rd	N59 33.232	W136 08.119	2011-08-04	Keep	snowshoe hare		2011-07-29	0751	B49_14
B49	2011-07-20	Kelsall Vlly Rd	N59 33.232	W136 08.119	2011-08-04	Keep	car		2011-07-31	1314	B49_15
B49	2011-07-20	Kelsall Vlly Rd	N59 33.232	W136 08.119	2011-08-04	Keep	car		2011-07-31	1432	B49_16
B49	2011-07-20	Kelsall Vlly Rd	N59 33.232	W136 08.119	2011-08-04	Keep	snowshoe hare		2011-08-01	0733	B49_17
B49	2011-07-20	Kelsall Vlly Rd	N59 33.232	W136 08.119	2011-08-04	Keep	black bear		2011-08-01	0748	B49_18
B49	2011-07-20	Kelsall Vlly Rd	N59 33.232	W136 08.119	2011-08-04	Keep	car		2011-08-01	2130	B49_19
B49	2011-07-20	Kelsall Vlly Rd	N59 33.232	W136 08.119	2011-08-04	Keep	black bear		2011-08-04	0452	B49_20
B49	2011-07-20	Kelsall Vlly Rd	N59 33.232	W136 08.119	2011-08-04	Keep	car		2011-08-04	1043	B49_21
B49	2011-07-20	Kelsall Vlly Rd	N59 33.232	W136 08.119	2011-08-04	Keep	car		2011-08-04	1043	B49_22
B49	2011-07-20	Kelsall Vlly Rd	N59 33.232	W136 08.119	2011-08-12	Remove	car		2011-08-05	950	B49_23
B49	2011-07-20	Kelsall Vlly Rd	N59 33.232	W136 08.119	2011-08-12	Remove	black bear		2011-08-05	2017	B49_24
B49	2011-07-20	Kelsall Vlly Rd	N59 33.232	W136 08.119	2011-08-12	Remove	car		2011-08-07	1222	B49_25
B49	2011-07-20	Kelsall Vlly Rd	N59 33.232	W136 08.119	2011-08-12	Remove	black bear		2011-08-07	1337	B49_26
B49	2011-07-20	Kelsall Vlly Rd	N59 33.232	W136 08.119	2011-08-12	Remove	car		2011-08-07	1459	B49_27
B49	2011-07-20	Kelsall Vlly Rd	N59 33.232	W136 08.119	2011-08-12	Remove	car		2011-08-07	1615	B49_28
B50	2011-07-21	Kelsall Vlly Rd	N59 33.233	W136 08.120	2011-08-12	Remove	black bear		2011-08-08	1830	B49_29
B50	2011-07-11	Nataga Vlly rd	N59 32.770	W136 07.624	2011-07-20	Keep	black bear		2011-07-12	1544	B50_1
B50	2011-07-11	Nataga Vlly rd	N59 32.770	W136 07.624	2011-07-20	Keep	car		2011-07-13	1852	B50_2
B50	2011-07-11	Nataga Vlly rd	N59 32.770	W136 07.624	2011-07-20	Keep	black bear		2011-07-14	2054	B50_3
B50	2011-07-11	Nataga Vlly rd	N59 32.770	W136 07.624	2011-07-20	Keep	black bear	sow	2011-07-15	1122	B50_4
B50	2011-07-11	Nataga Vlly rd	N59 32.770	W136 07.624	2011-07-20	Keep	black bear	cub	2011-07-15	1122	B50_5
B50	2011-07-11	Nataga Vlly rd	N59 32.770	W136 07.624	2011-07-20	Keep	black bear	cub	2011-07-15	1122	B50_6
B50	2011-07-11	Nataga Vlly rd	N59 32.770	W136 07.624	2011-07-20	Keep	coyote		2011-07-16	0231	B50_7
B50	2011-07-11	Nataga Vlly rd	N59 32.770	W136 07.624	2011-07-20	Keep	car		2011-07-16	1233	B50_8
B50	2011-07-11	Nataga Vlly rd	N59 32.770	W136 07.624	2011-07-20	Keep	car		2011-07-17	1613	B50_9
B50	2011-07-11	Nataga Vlly rd	N59 32.770	W136 07.624	2011-07-20	Keep	moose	cow	2011-07-18	1410	B50_10
B50	2011-07-11	Nataga Vlly rd	N59 32.770	W136 07.624	2011-07-20	Keep	snowshoe hare		2011-07-19	0215	B50_11
B50	2011-07-11	Nataga Vlly rd	N59 32.770	W136 07.624	2011-07-20	Keep	coyote		2011-07-19	0736	B50_12
B50	2011-07-11	Nataga Vlly rd	N59 32.770	W136 07.624	2011-07-20	Keep	black bear		2011-07-19	2139	B50_13
B50	2011-07-11	Nataga Vlly rd	N59 32.770	W136 07.624	2011-07-20	Keep	car		2011-07-20	1318	B50_14
B50	2011-07-11	Nataga Vlly rd	N59 32.770	W136 07.624	2011-07-20	Keep	car		2011-07-20	1504	B50_15
B50	2011-07-20	Nataga Vlly rd	N59 32.770	W136 07.624	2011-08-04	keep	car		2011-07-22	2150	B50_16
B50	2011-07-20	Nataga Vlly rd	N59 32.770	W136 07.624	2011-08-04	keep	snowshoe hare		2011-07-25	0417	B50_17
B50	2011-07-20	Nataga Vlly rd	N59 32.770	W136 07.624	2011-08-04	keep	car		2011-07-25	1306	B50_18
B50	2011-07-20	Nataga Vlly rd	N59 32.770	W136 07.624	2011-08-04	keep	car		2011-07-25	1502	B50_19
B50	2011-07-20	Nataga Vlly rd	N59 32.770	W136 07.624	2011-08-04	keep	car		2011-07-25	1502	B50_20
B50	2011-07-20	Nataga Vlly rd	N59 32.770	W136 07.624	2011-08-04	keep	black bear		2011-07-26	1853	B50_21
B50	2011-07-20	Nataga Vlly rd	N59 32.770	W136 07.624	2011-08-04	keep	car		2011-07-27	2121	B50_22
B50	2011-07-20	Nataga Vlly rd	N59 32.770	W136 07.624	2011-08-04	keep	car		2011-07-28	1721	B50_23
B50	2011-07-20	Nataga Vlly rd	N59 32.770	W136 07.624	2011-08-04	keep	moose	cow	2011-07-30	0608	B50_24
B50	2011-07-20	Nataga Vlly rd	N59 32.770	W136 07.624	2011-08-04	keep	car		2011-07-30	1255	B50_25
B50	2011-07-20	Nataga Vlly rd	N59 32.770	W136 07.624	2011-08-04	keep	car		2011-07-31	1538	B50_26
B50	2011-07-20	Nataga Vlly rd	N59 32.770	W136 07.624	2011-08-04	keep	car		2011-08-01	1409	B50_27
B50	2011-07-20	Nataga Vlly rd	N59 32.770	W136 07.624	2011-08-04	keep	car		2011-08-02	1343	B50_28
B50	2011-07-20	Nataga Vlly rd	N59 32.770	W136 07.624	2011-08-04	keep	dog		2011-08-02	1508	B50_29
B50	2011-07-20	Nataga Vlly rd	N59 32.770	W136 07.624	2011-08-04	keep	dog		2011-08-02	1508	B50_30
B50	2011-07-20	Nataga Vlly rd	N59 32.770	W136 07.624	2011-08-04	keep	car		2011-08-03	1250	B50_31
B50	2011-08-04	Nataga Vlly rd	N59 32.770	W136 07.624	2011-08-12	remove	car		2011-08-04	1555	B50_32
B50	2011-08-04	Nataga Vlly rd	N59 32.770	W136 07.624	2011-08-12	remove	car		2011-08-04	1802	B50_33
B50	2011-08-04	Nataga Vlly rd	N59 32.770	W136 07.624	2011-08-12	remove	car		2011-08-05	1431	B50_34
B50	2011-08-04	Nataga Vlly rd	N59 32.770	W136 07.624	2011-08-12	remove	coyote		2011-08-05	2133	B50_35
B50	2011-08-04	Nataga Vlly rd	N59 32.770	W136 07.624	2011-08-12	remove	car		2011-08-07	1522	B50_36
B50	2011-08-04	Nataga Vlly rd	N59 32.770	W136 07.624	2011-08-12	remove	car		2011-08-07	1638	B50_37
B50	2011-08-04	Nataga Vlly rd	N59 32.770	W136 07.624	2011-08-12	remove	car		2011-08-08	1053	B50_38
B50	2011-08-04	Nataga Vlly rd	N59 32.770	W136 07.624	2011-08-12	remove	car		2011-08-09	1019	B50_39
B50	2011-08-04	Nataga Vlly rd	N59 32.770	W136 07.624	2011-08-12	remove	car		2011-08-09	1424	B50_40
B50	2011-08-04	Nataga Vlly rd	N59 32.770	W136 07.624	2011-08-12	remove	car		2011-08-10	0919	B50_41
B50	2011-08-04	Nataga Vlly rd	N59 32.770	W136 07.624	2011-08-12	remove	car		2011-08-10	1323	B50_42
B50	2011-08-04	Nataga Vlly rd	N59 32.770	W136 07.624	2011-08-12	remove	car		2011-08-10	1352	B50_43
B51	2011-07-22	Kelsall Vlly Rd	N59 33.234	W136 08.121	2011-08-12	Remove	black bear		2011-08-08	2052	B49_30
B51	2011-07-11	Kelsall ATV tr.	N59 32.390	W136 06.095	2011-07-20	Remove	Dog		2011-07-12	1629	B51_1
B51	2011-07-11	Kelsall ATV tr.	N59 32.390	W136 06.095	2011-07-20	Remove	Dog		2011-07-12	1630	B51_2
B51	2011-07-11	Kelsall ATV tr.	N59 32.390	W136 06.095	2011-07-20	Remove	human		2011-07-12	1638	B51_3
B51	2011-07-11	Kelsall ATV tr.	N59 32.390	W136 06.095	2011-07-20	Remove	Dog		2011-07-12	1638	B51_4
B51	2011-07-11	Kelsall ATV tr.	N59 32.390	W136 06.095	2011-07-20	Remove	human		2011-07-12	1638	B51_5
B51	2011-07-11	Kelsall ATV tr.	N59 32.390	W136 06.095	2011-07-20	Remove	Dog		2011-07-16	1215	B51_6
B51	2011-07-11	Kelsall ATV tr.	N59 32.390	W136 06.095	2011-07-20	Remove	human		2011-07-16	1218	B51_7
B51	2011-07-11	Kelsall ATV tr.	N59 32.390	W136 06.095	2011-07-20	Remove	human		2011-07-16	1218	B51_8
B51	2011-07-11	Kelsall ATV tr.	N59 32.390	W136 06.095	2011-07-20	Remove	human		2011-07-16	1215	B51_9
B51	2011-07-11	Kelsall ATV tr.	N59 32.390	W136 06.095	2011-07-20	Remove	human		2011-07-16	1215	B51_10
B51	2011-07-11	Kelsall ATV tr.	N59 32.390	W136 06.095	2011-07-20	Remove	human		2011-07-16	1215	B51_11
B51	2011-07-11	Kelsall ATV tr.	N59 32.390	W136 06.095	2011-07-20	Remove	human		2011-07-17	1342	B51_12
B52	2011-07-23	Kelsall Vlly Rd	N59 33.235	W136 08.122	2011-08-12	Remove	car		2011-08-09	1115	B49_31
B52	2011-07-11	Nataga Vlly rd	N59 32.654	W136 07.877	2011-07-20	Keep	car		2011-07-13	1851	B52_1
B52	2011-07-11	Nataga Vlly rd	N59 32.654	W136 07.877	2011-07-20	Keep	Black bear		2011-07-16	1144	B52_2
B52	2011-07-11	Nataga Vlly rd	N59 32.654	W136 07.877	2011-07-20	Keep	car		2011-07-16	1235	B52_3
B52	2011-07-11	Nataga Vlly rd	N59 32.654	W136 07.877	2011-07-20	Keep	black bear		2011-07-16	1552	B52_4
B52	2011-07-11	Nataga Vlly rd	N59 32.654	W136 07.877	2011-07-20	Keep	car		2011-07-17	1605	B52_5
B52	2011-07-11	Nataga Vlly rd	N59 32.654	W136 07.877	2011-07-20	Keep	moose	cow	2011-07-18	1404	B52_6
B52	2011-07-11	Nataga Vlly rd	N59 32.654	W136 07.877	2011-07-20	Keep	car		2011-07-20	1321	B52_7
B52	2011-07-11	Nataga Vlly rd	N59 32.654	W136 07.877	2011-07-20	Keep	car		2011-07-20	1507	B52_8
B52	2011-07-20	Nataga Vlly rd	N59 32.654	W136 07.877	2011-08-12	Keep	car		2011-07-22	2156	B52_9
B52	2011-07-20	Nataga Vlly rd	N59 32.654	W136 07.877	2011-08-12	Keep	car		2011-07-25	1310	B52_10
B52	2011-07-20	Nataga Vlly rd	N59 32.654	W136 07.877	2011-08-12	Keep	car		2011-07-25	1505	B52_11
B52	2011-07-20	Nataga Vlly rd	N59 32.654	W136 07.877	2011-08-12	Keep	car		2011-07-25	1505	B52_12
B52	2011-07-20	Nataga Vlly rd	N59 32.654	W136 07.877	2011-08-12	Keep	car		2011-07-27	2124	B52_13
B52	2011-07-20	Nataga Vlly rd	N59 32.654	W136 07.877	2011-08-12	Keep	car		2011-07-28	1751	B52_14
B52	2011-07-20	Nataga Vlly rd	N59 32.654	W136 07.877	2011-08-12	Keep	moose	cow	2011-07-30	0623	B52_15
B52	2011-07-20	Nataga Vlly rd	N59 32.654	W136 07.877	2011-08-12	Keep	car		2011-07-31	1533	B52_16
B52	2011-07-20	Nataga Vlly rd	N59 32.654	W136 07.877	2011-08-12	Keep	car		2011-08-01	1411	B52_17
B52	2011-07-20	Nataga Vlly rd	N59 32.654	W136 07.877	2011-08-12	Keep	car		2011-08-02	1346	B52_18
B52	2011-07-20	Nataga Vlly rd	N59 32.654	W136 07.877	2011-08-12	Keep	dog		2011-08-02	1505	B52_19
B52	2011-07-20	Nataga Vlly rd	N59 32.654	W136 07.877	2011-08-12	Keep	car		2011-08-03	1252	B52_20
B52	2011-07-20	Nataga Vlly rd	N59 32.654	W136 07.877	2011-08-12	Keep	snowshoe hare		2011-08-04	0335	B52_21
B52	2011-07-20	Nataga Vlly rd	N59 32.654	W136 07.877	2011-08-12	Keep	car		2011-08-04	1540	B52_22
B52	2011-07-20	Nataga Vlly rd	N59 32.654	W136 07.877	2011-08-12	Keep	car		2011-08-04	1540	B52_23
B52	2011-07-20	Nataga Vlly rd	N59 32.654	W136 07.877	2011-08-12	Keep	car		2011-08-04	1631	B52_24
B52	2011-07-20	Nataga Vlly rd	N59 32.654	W136 07.877	2011-08-12	Keep	snowshoe hare		2011-08-05	0356	B52_25
B52	2011-07-20	Nataga Vlly rd	N59 32.654	W136 07.877	2011-08-12	Keep	car		2011-08-05	0814	B52_26
B52	2011-07-20	Nataga Vlly rd	N59 32.654	W136 07.877	2011-08-12	Keep	car		2011-08-05	1434	B52_27
B52	2011-07-20	Nataga Vlly rd	N59 32.654	W136 07.877	2011-08-12	Keep	car		2011-08-07	1605	B52_28
B52	2011-07-20	Nataga Vlly rd	N59 32.654	W136 07.877	2011-08-12	Keep	car		2011-08-07	1637	B52_29
B52	2011-07-20	Nataga Vlly rd	N59 32.654	W136 07.877	2011-08-12	Keep	car		2011-08-08	1034	B52_30
B52	2011-07-20	Nataga Vlly rd	N59 32.654	W136 07.877	2011-08-12	Keep	car		2011-08-09	1022	B52_31
B52	2011-07-20	Nataga Vlly rd	N59 32.654	W136 07.877	2011-08-12	Keep	car		2011-08-09	1428	B52_32
B52	2011-07-20	Nataga Vlly rd	N59 32.654	W136 07.877	2011-08-12	Keep	car		2011-08-10	0923	B52_33
B52	2011-07-20	Nataga Vlly rd	N59 32.654	W136 07.877	2011-08-12	Keep	car		2011-08-10	1331	B52_34
B52	2011-07-20	Nataga Vlly rd	N59 32.654	W136 07.877	2011-08-12	Keep	car		2011-08-10	1350	B52_35
B52	2011-08-12	Nataga Vlly rd	N59 32.654	W136 07.877	2011-08-19	Remove					B52_36
B53	2011-07-24	Kelsall Vlly Rd	N59 33.236	W136 08.123	2011-08-12	Remove	car		2011-08-09	1454	B49_32
B54	2011-07-25	Kelsall Vlly Rd	N59 33.237	W136 08.124	2011-08-12	Remove	car		2011-08-10	1026	B49_33
B54	2011-07-25	Kelsall Vlly Rd	N59 33.237	W136 08.124	2011-08-12	Remove	car		2011-08-10	1410	B49_34
B54	2011-07-25	Kelsall Vlly Rd	N59 33.237	W136 08.124	2011-08-12	Remove	moose	bull	2011-08-10	2332	B49_35
B54	2011-07-11	Kelsall ATV tr.	N59 32.766	W136 06.042	2011-07-20	Keep	moose	cow	2011-07-12	1506	B54_1
B54	2011-07-11	Kelsall ATV tr.	N59 32.766	W136 06.042	2011-07-20	Keep	moose	calf	2011-07-12	1506	B54_2
B54	2011-07-11	Kelsall ATV tr.	N59 32.766	W136 06.042	2011-07-20	Keep	black bear		2011-07-14	1156	B54_3
B54	2011-07-11	Kelsall ATV tr.	N59 32.766	W136 06.042	2011-07-20	Keep	black bear		2011-07-18	652	B54_4
B54	2011-07-20	Kelsall ATV tr.	N59 32.766	W136 06.042	2011-08-04	Keep	moose	cow	2011-07-21	2126	B54_5
B54	2011-07-20	Kelsall ATV tr.	N59 32.766	W136 06.042	2011-08-04	Keep	moose	calf	2011-07-21	2126	B54_6
B54	2011-07-20	Kelsall ATV tr.	N59 32.766	W136 06.042	2011-08-04	Keep	brown bear		2011-07-24	2059	B54_7
B54	2011-07-20	Kelsall ATV tr.	N59 32.766	W136 06.042	2011-08-04	Keep	wolf		2011-07-30	1917	B54_8
B54	2011-07-20	Kelsall ATV tr.	N59 32.766	W136 06.042	2011-08-04	Keep	brown bear		2011-07-31	0000	B54_9
B54	2011-07-20	Kelsall ATV tr.	N59 32.766	W136 06.042	2011-08-04	Keep	human		2011-07-31	1518	B54_10
B54	2011-07-20	Kelsall ATV tr.	N59 32.766	W136 06.042	2011-08-04	Keep	brown bear		2011-08-01	2332	B54_11
B54	2011-08-04	Kelsall ATV tr.	N59 32.766	W136 06.042	2011-08-19	Remove	coyote		2011-08-13	0757	B54_12
B54	2011-08-04	Kelsall ATV tr.	N59 32.766	W136 06.042	2011-08-19	Remove	lynx		2011-08-14	0441	B54_13
B55	2011-07-01	Mosq LK FS L1	N59 27.984'	W135 02.390'	2011-07-09	Keep	coyote		2011-07-03	0145	B55_1
B55	2011-07-01	Mosq LK FS L1	N59 27.984'	W135 02.390'	2011-07-09	Keep	coyote		2011-07-04	2118	B55_2
B55	2011-07-01	Mosq LK FS L1	N59 27.984'	W135 02.390'	2011-07-09	Keep	coyote		2011-07-05	2002	B55_3
B55	2011-07-01	Mosq LK FS L1	N59 27.984'	W135 02.390'	2011-07-09	Keep	coyote		2011-07-07	0500	B55_4
B55	2011-07-09	Mosq LK FS L1	N59 27.984'	W135 02.390'	2011-07-20	Keep	car		2011-07-10	1422	B55_5
B55	2011-07-09	Mosq LK FS L1	N59 27.984'	W135 02.390'	2011-07-20	Keep	coyote		2011-07-11	0206	B55_6
B55	2011-07-09	Mosq LK FS L1	N59 27.984'	W135 02.390'	2011-07-20	Keep	car		2011-07-11	1047	B55_7
B55	2011-07-09	Mosq LK FS L1	N59 27.984'	W135 02.390'	2011-07-20	Keep	car		2011-07-11	1110	B55_8
B55	2011-07-09	Mosq LK FS L1	N59 27.984'	W135 02.390'	2011-07-20	Keep	car		2011-07-12	0858	B55_9
B55	2011-07-09	Mosq LK FS L1	N59 27.984'	W135 02.390'	2011-07-20	Keep	car		2011-07-12	1249	B55_10
B55	2011-07-09	Mosq LK FS L1	N59 27.984'	W135 02.390'	2011-07-20	Keep	car		2011-07-15	0625	B55_11
B55	2011-07-09	Mosq LK FS L1	N59 27.984'	W135 02.390'	2011-07-20	Keep	car		2011-07-15	0917	B55_12
B55	2011-07-09	Mosq LK FS L1	N59 27.984'	W135 02.390'	2011-07-20	Keep	black bear		2011-07-15	1827	B55_13
B55	2011-07-09	Mosq LK FS L1	N59 27.984'	W135 02.390'	2011-07-20	Keep	car		2011-07-17	1245	B55_14
B55	2011-07-09	Mosq LK FS L1	N59 27.984'	W135 02.390'	2011-07-20	Keep	car		2011-07-17	1134	B55_15
B55	2011-07-09	Mosq LK FS L1	N59 27.984'	W135 02.390'	2011-07-20	Keep	car		2011-07-18	1416	B55_16
B55	2011-07-09	Mosq LK FS L1	N59 27.984'	W135 02.390'	2011-07-20	Keep	human		2011-07-20	1424	B55_17
B55	2011-07-09	Mosq LK FS L1	N59 27.984'	W135 02.390'	2011-07-20	Keep	car		2011-07-20	2007	B55_18
B55	2011-07-09	Mosq LK FS L1	N59 27.984'	W135 02.390'	2011-07-20	Keep	dog		2011-07-20	2035	B55_19
B55	2011-07-09	Mosq LK FS L1	N59 27.984'	W135 02.390'	2011-07-20	Keep	car		2011-07-20	2037	B55_20
B55	2011-07-09	Mosq LK FS L1	N59 27.984'	W135 02.390'	2011-07-20	Keep	coyote		2011-07-21	1855	B55_21
B55	2011-07-20	Mosq LK FS L1	N59 27.984'	W135 02.390'	2011-08-06	Keep	coyote		2011-07-24	1940	B55_22
B55	2011-07-20	Mosq LK FS L1	N59 27.984'	W135 02.390'	2011-08-06	Keep	black bear		2011-07-26	0445	B55_23
B55	2011-07-20	Mosq LK FS L1	N59 27.984'	W135 02.390'	2011-08-06	Keep	black bear		2011-07-28	2218	B55_24
B55	2011-07-20	Mosq LK FS L1	N59 27.984'	W135 02.390'	2011-08-06	Keep	black bear		2011-08-04	1540	B55_25
B55	2011-07-20	Mosq LK FS L1	N59 27.984'	W135 02.390'	2011-08-06	Keep	coyote		2011-08-06	0831	B55_26
B55	2011-08-06	Mosq LK FS L1	N59 27.984'	W135 02.390'	2011-08-12	Remove	coyote		2011-08-07	1525	B55_27
B55	2011-08-06	Mosq LK FS L1	N59 27.984'	W135 02.390'	2011-08-12	Remove	coyote		2011-08-09	0150	B55_28
B55	2011-08-06	Mosq LK FS L1	N59 27.984'	W135 02.390'	2011-08-12	Remove	car		2011-08-12	1017	B55_29
B56	2011-07-11	Nataga Cr. Cmp	N59 32.326	W136 05.858	2011-07-20	keep	dog		2011-07-11	1700	B56_1
B56	2011-07-11	Nataga Cr. Cmp	N59 32.326	W136 05.858	2011-07-20	keep	dog		2011-07-11	1700	B56_2
B56	2011-07-11	Nataga Cr. Cmp	N59 32.326	W136 05.858	2011-07-20	keep	dog		2011-07-11	1700	B56_3
B56	2011-07-11	Nataga Cr. Cmp	N59 32.326	W136 05.858	2011-07-20	keep	human		2011-07-11	1700	B56_4
B56	2011-07-11	Nataga Cr. Cmp	N59 32.326	W136 05.858	2011-07-20	keep	human		2011-07-11	1700	B56_5
B56	2011-07-11	Nataga Cr. Cmp	N59 32.326	W136 05.858	2011-07-20	keep	dog		2011-07-11	1700	B56_6
B56	2011-07-11	Nataga Cr. Cmp	N59 32.326	W136 05.858	2011-07-20	keep	coyote		2011-07-18	0252	B56_7
B56	2011-07-20	Nataga Cr. Cmp	N59 32.326	W136 05.858	2011-08-06	keep	coyote		2011-07-31	0454	B56_8
B56	2011-07-20	Nataga Cr. Cmp	N59 32.326	W136 05.858	2011-08-06	keep	human		2011-08-02	1300	B56_9
B56	2011-07-20	Nataga Cr. Cmp	N59 32.326	W136 05.858	2011-08-06	keep	human		2011-08-02	1300	B56_10
B56	2011-07-20	Nataga Cr. Cmp	N59 32.326	W136 05.858	2011-08-06	keep	brown bear	unclear	2011-07-23	0405	B56_11
B56	2011-08-06	Nataga Cr. Cmp	N59 32.326	W136 05.858	2011-08-12	remove	coyote	unclear	2011-08-07	0413	B56_12
B56	2011-08-06	Nataga Cr. Cmp	N59 32.326	W136 05.858	2011-08-12	remove	human		2011-08-09	0823	B56_13
B56	2011-08-06	Nataga Cr. Cmp	N59 32.326	W136 05.858	2011-08-12	remove	human		2011-08-09	0823	B56_14
B56	2011-08-06	Nataga Cr. Cmp	N59 32.326	W136 05.858	2011-08-12	remove	human		2011-08-10	1318	B56_15
B56	2011-08-06	Nataga Cr. Cmp	N59 32.326	W136 05.858	2011-08-12	remove	human		2011-08-10	1346	B56_16
B57	2011-07-11	Nataga Vlly rd	N59 32.718	W136 08.714	2011-07-20	Keep	black bear		2011-07-12	1132	B57_1
B57	2011-07-11	Nataga Vlly rd	N59 32.718	W136 08.714	2011-07-20	Keep	black bear		2011-07-12	1412	B57_2
B57	2011-07-11	Nataga Vlly rd	N59 32.718	W136 08.714	2011-07-20	Keep	car		2011-07-13	1844	B57_3
B57	2011-07-11	Nataga Vlly rd	N59 32.718	W136 08.714	2011-07-20	Keep	coyote		2011-07-16	0301	B57_4
B57	2011-07-11	Nataga Vlly rd	N59 32.718	W136 08.714	2011-07-20	Keep	black bear		2011-07-16	1918	B57_5
B57	2011-07-11	Nataga Vlly rd	N59 32.718	W136 08.714	2011-07-20	Keep	black bear		2011-07-16	2205	B57_6
B57	2011-07-11	Nataga Vlly rd	N59 32.718	W136 08.714	2011-07-20	Keep	black bear		2011-07-17	0538	B57_7
B57	2011-07-11	Nataga Vlly rd	N59 32.718	W136 08.714	2011-07-20	Keep	moose	cow	2011-07-18	1351	B57_8
B57	2011-07-11	Nataga Vlly rd	N59 32.718	W136 08.714	2011-08-12	Remove	brown bear		2011-07-22	1528	B57_9
B57	2011-07-11	Nataga Vlly rd	N59 32.718	W136 08.714	2011-08-12	Remove	car		2011-07-25	1508	B57_10
B57	2011-07-11	Nataga Vlly rd	N59 32.719	W136 08.715	2011-08-12	Remove	car		2011-07-25	1509	B57_11
B57	2011-07-11	Nataga Vlly rd	N59 32.720	W136 08.716	2011-08-12	Remove	car		2011-07-28	1756	B57_12
B57	2011-07-11	Nataga Vlly rd	N59 32.721	W136 08.717	2011-08-12	Remove	moose	cow	2011-07-30	647	B57_13
B57	2011-07-11	Nataga Vlly rd	N59 32.722	W136 08.718	2011-08-12	Remove	black bear		2011-07-30	1347	B57_14
B57	2011-07-11	Nataga Vlly rd	N59 32.723	W136 08.719	2011-08-12	Remove	brown bear	unclear	2011-07-31	856	B57_15
B57	2011-07-11	Nataga Vlly rd	N59 32.724	W136 08.720	2011-08-12	Remove	car		2011-07-31	1529	B57_16
B57	2011-07-11	Nataga Vlly rd	N59 32.725	W136 08.721	2011-08-12	Remove	car		2011-08-01	1420	B57_17
B57	2011-07-11	Nataga Vlly rd	N59 32.726	W136 08.722	2011-08-12	Remove	dog		2011-08-07	1251	B57_18
B57	2011-07-11	Nataga Vlly rd	N59 32.727	W136 08.723	2011-08-12	Remove	dog		2011-08-07	1251	B57_19
B57	2011-07-11	Nataga Vlly rd	N59 32.728	W136 08.724	2011-08-12	Remove	human		2011-08-07	1252	B57_20
B57	2011-07-11	Nataga Vlly rd	N59 32.729	W136 08.725	2011-08-12	Remove	human		2011-08-07	1252	B57_21
B57	2011-07-11	Nataga Vlly rd	N59 32.730	W136 08.726	2011-08-12	Remove	human		2011-08-07	1252	B57_22
B57	2011-07-11	Nataga Vlly rd	N59 32.731	W136 08.727	2011-08-12	Remove	car		2011-08-07	1600	B57_23
B57	2011-07-11	Nataga Vlly rd	N59 32.732	W136 08.728	2011-08-12	Remove	car		2011-08-09	1029	B57_24
B57	2011-07-11	Nataga Vlly rd	N59 32.733	W136 08.729	2011-08-12	Remove	car		2011-08-09	1434	B57_25
B57	2011-07-11	Nataga Vlly rd	N59 32.734	W136 08.730	2011-08-12	Remove	car		2011-08-10	1341	B57_26
B57	2011-07-11	Nataga Vlly rd	N59 32.735	W136 08.731	2011-08-12	Remove	car		2011-08-10	1342	B57_27
B58	2011-07-11	Kelsall ATV tr.	N59 32.508	W136 05.916	2011-07-20	Keep	car		2011-07-13	2058	B58_1
B58	2011-07-11	Kelsall ATV tr.	N59 32.508	W136 05.916	2011-07-20	Keep	snowshoe hare		2011-07-16	2315	B58_2
B58	2011-07-20	Kelsall ATV tr.	N59 32.508	W136 05.916	2011-08-04	Keep	car		2011-07-21	1333	B58_3
B58	2011-07-20	Kelsall ATV tr.	N59 32.508	W136 05.916	2011-08-04	Keep	car		2011-07-21	1333	B58_4
B58	2011-07-20	Kelsall ATV tr.	N59 32.508	W136 05.916	2011-08-04	Keep	wolf		2011-07-21	2229	B58_5
B58	2011-07-20	Kelsall ATV tr.	N59 32.508	W136 05.916	2011-08-04	Keep	wolf		2011-07-21	2230	B58_6
B58	2011-07-20	Kelsall ATV tr.	N59 32.508	W136 05.916	2011-08-04	Keep	squirrel		2011-07-22	0708	B58_7
B58	2011-07-20	Kelsall ATV tr.	N59 32.508	W136 05.916	2011-08-04	Keep	human		2011-07-27	1438	B58_8
B58	2011-07-20	Kelsall ATV tr.	N59 32.508	W136 05.916	2011-08-04	Keep	snowshoe hare		2011-07-29	2346	B58_9
B58	2011-07-20	Kelsall ATV tr.	N59 32.508	W136 05.916	2011-08-04	Keep	wolf		2011-07-30	1921	B58_10
B58	2011-07-20	Kelsall ATV tr.	N59 32.508	W136 05.916	2011-08-04	Keep	human		2011-07-31	1346	B58_11
B58	2011-07-20	Kelsall ATV tr.	N59 32.508	W136 05.916	2011-08-04	Keep	black bear		2011-08-02	1628	B58_12
B58	2011-07-20	Kelsall ATV tr.	N59 32.508	W136 05.916	2011-08-04	Keep	brown bear		2011-08-03	1404	B58_13
B58	2011-08-04	Kelsall ATV tr.	N59 32.508	W136 05.916	2011-08-19	Remove	coyote		2011-08-06	0505	B58_14
B58	2011-08-04	Kelsall ATV tr.	N59 32.508	W136 05.916	2011-08-19	Remove	snowshoe hare		2011-08-09	2326	B58_15
B58	2011-08-04	Kelsall ATV tr.	N59 32.508	W136 05.916	2011-08-19	Remove	snowshoe hare		2011-08-10	0159	B58_16
B58	2011-08-04	Kelsall ATV tr.	N59 32.508	W136 05.916	2011-08-19	Remove	snowshoe hare		2011-08-10	2154	B58_17
B58	2011-08-04	Kelsall ATV tr.	N59 32.508	W136 05.916	2011-08-19	Remove	snowshoe hare		2011-08-10	2317	B58_18
B58	2011-08-04	Kelsall ATV tr.	N59 32.508	W136 05.916	2011-08-19	Remove	snowshoe hare		2011-08-11	0001	B58_19
B58	2011-08-04	Kelsall ATV tr.	N59 32.508	W136 05.916	2011-08-19	Remove	black bear		2011-08-11	0535	B58_20
B58	2011-08-04	Kelsall ATV tr.	N59 32.508	W136 05.916	2011-08-19	Remove	black bear		2011-08-11	0855	B58_21
B58	2011-08-04	Kelsall ATV tr.	N59 32.508	W136 05.916	2011-08-19	Remove	snowshoe hare		2011-08-11	2300	B58_22
B58	2011-08-04	Kelsall ATV tr.	N59 32.508	W136 05.916	2011-08-19	Remove	squirrel		2011-08-12	0803	B58_23
B58	2011-08-04	Kelsall ATV tr.	N59 32.508	W136 05.916	2011-08-19	Remove	snowshoe hare		2011-08-13	0246	B58_24
B58	2011-08-04	Kelsall ATV tr.	N59 32.508	W136 05.916	2011-08-19	Remove	snowshoe hare		2011-08-13	0418	B58_25
B58	2011-08-04	Kelsall ATV tr.	N59 32.508	W136 05.916	2011-08-19	Remove	lynx		2011-08-14	0427	B58_26
B58	2011-08-04	Kelsall ATV tr.	N59 32.508	W136 05.916	2011-08-19	Remove	squirrel		2011-08-14	0528	B58_27
B58	2011-08-04	Kelsall ATV tr.	N59 32.508	W136 05.916	2011-08-19	Remove	snowshoe hare		2011-08-16	2212	B58_28
B58	2011-08-04	Kelsall ATV tr.	N59 32.508	W136 05.916	2011-08-19	Remove	snowshoe hare		2011-08-17	0307	B58_29
B58	2011-08-04	Kelsall ATV tr.	N59 32.508	W136 05.916	2011-08-19	Remove	snowshoe hare		2011-08-17	2221	B58_30
B58	2011-08-04	Kelsall ATV tr.	N59 32.508	W136 05.916	2011-08-19	Remove	squirrel		2011-08-18	0600	B58_31
B58	2011-08-04	Kelsall ATV tr.	N59 32.508	W136 05.916	2011-08-19	Remove	car		2011-08-18	1202	B58_32
B58	2011-08-04	Kelsall ATV tr.	N59 32.508	W136 05.916	2011-08-19	Remove	car		2011-08-18	1450	B58_33
B60	2011-07-01	Mosq LK FS L1	N59 29.412'	W136 03.827'	2011-07-09	Keep	moose	bull	2011-07-01	2140	B60_1
B60	2011-07-01	Mosq LK FS L1	N59 29.412'	W136 03.827'	2011-07-09	Keep	brown bear		2011-07-02	0920	B60_2
B60	2011-07-01	Mosq LK FS L1	N59 29.412'	W136 03.827'	2011-07-09	Keep	grouse		2011-07-03	2400	B60_3
B60	2011-07-01	Mosq LK FS L1	N59 29.412'	W136 03.827'	2011-07-09	Keep	grouse		2011-07-03	2400	B60_4
B60	2011-07-09	Mosq LK FS L1	N59 29.412'	W136 03.827'	2011-07-20	Keep	brown bear	sow	2011-07-13	2032	B60_5
B60	2011-07-09	Mosq LK FS L1	N59 29.412'	W136 03.827'	2011-07-20	Keep	brown bear	cub	2011-07-13	2032	B60_6
B60	2011-07-20	Mosq LK FS L1	N59 29.412'	W136 03.827'	2011-08-04	Keep	moose	bull	2011-07-20	1608	B60_7
B60	2011-07-20	Mosq LK FS L1	N59 29.412'	W136 03.827'	2011-08-04	Keep	moose	cow	2011-07-20	1608	B60_8
B60	2011-07-20	Mosq LK FS L1	N59 29.412'	W136 03.827'	2011-08-04	Keep	black bear		2011-07-20	1752	B60_9
B60	2011-07-20	Mosq LK FS L1	N59 29.412'	W136 03.827'	2011-08-04	Keep	black bear		2011-07-24	0234	B60_10
B60	2011-07-20	Mosq LK FS L1	N59 29.412'	W136 03.827'	2011-08-04	Keep	brown bear		2011-07-24	1846	B60_11
B60	2011-07-20	Mosq LK FS L1	N59 29.412'	W136 03.827'	2011-08-04	Keep	black bear		2011-07-24	2247	B60_12
B60	2011-07-20	Mosq LK FS L1	N59 29.412'	W136 03.827'	2011-08-04	Keep	black bear		2011-07-31	2001	B60_13
B60	2011-08-04	Mosq LK FS L1	N59 29.412'	W136 03.827'	2011-08-19	Remove	black bear		2011-08-04	2013	B60_14
B60	2011-08-04	Mosq LK FS L1	N59 29.412'	W136 03.827'	2011-08-19	Remove	brown bear		2011-08-09	0647	B60_15
B60	2011-08-04	Mosq LK FS L1	N59 29.412'	W136 03.827'	2011-08-19	Remove	black bear		2011-08-15	1800	B60_16
